# Supplementary material for: Antibiofilm Properties of Antiseptic Agents Used on Pseudomonas aeruginosa Isolated from Diabetic Foot Ulcers
Source: MDPI journal article supplement (doi:10.3390/ijms231911270), 2022-09-24
Supplement: s1 [file s1]

Supplementary material: Antibiofilm properties of antiseptics on *P.aeruginosa* biofilm

**Table S1** : Bacterial load values of 72H biofilm for all strains

| Strains | PAO1 |          | PAC1     |          | PAC2     |          | PAC4     |       |
|---------|------|----------|----------|----------|----------|----------|----------|-------|
| Media   | BHI  | CWM      | BHI      | CWM      | BHI      | CWM      | BHI      | CWM   |
|         | 175  | 124      | 158      | 218      | 97       | 141      | 93       | 208   |
|         | 194  | 198      | 177      | 201      | 118      | 162      | 104      | 213   |
|         | 207  | 383      | 121      | 286      | 125      | 254      | 179      | 297   |
|         | 139  | 278      | 203      | 179      | 229      | 340      | 183      | 127   |
|         | 118  | 244      | 119      | 233      | 117      | 310      | 129      | 254   |
|         | 151  | 257      | 126      | 189      | 231      | 171      | 121      | 182   |
| Mean    | 164  | 247.3333 | 150.6667 | 217.6667 | 152.8333 | 229.6667 | 134.8333 | 213.5 |

**Table S2** : Biofilm percentage before and after 72h ATS contact in dynamic flow model

| PAO1    |                     |       |         |        |         |        |          |        |            |        |        |        |
|---------|---------------------|-------|---------|--------|---------|--------|----------|--------|------------|--------|--------|--------|
| ATS     | Sodium Hypochlorite |       |         |        | PHMB    |        |          |        | Octenidine |        |        |        |
| Media   | BHI                 |       | CWM     |        | BHI     |        | CWM      |        | BHI        |        | CWM    |        |
|         | DBD*                | H     | DBD     | H      | DBD     | H      | DBD      | H      | DBD        | H      | DBD    | H      |
|         | 14.36%              | 2.66% | 29.71%  | 8.28%  | 6.51%   | 3.83%  | 8.88%    | 9.74%  | 7.33%      | 4.78%  | 8.55%  | 7.16%  |
|         | 11.15%              | 4.19% | 27.22%  | 14.96% | 5.28%   | 5.56%  | 11.77%   | 8.14%  | 6.42%      | 4.63%  | 8.98%  | 14.60% |
|         | 11.65%              | 2.43% | 33.83%  | 7.89%  | 6.85%   | 3.61%  | 7.89%    | 7.72%  | 6.71%      | 4.77%  | 7.50%  | 8.11%  |
|         | 13.25%              | 3.85% | 16.47%  | 10.31% | 5.11%   | 5.31%  | 8.19%    | 6.47%  | 7.38%      | 4.30%  | 4.84%  | 4.23%  |
|         | 7.13%               | 4.85% | 4.53%   | 13.63% | 23.91%  | 17.85% | 10.46%   | 7.82%  | 11.24%     | 6.36%  | 13.31% | 20.97% |
|         | 6.86%               | 5.84% | 18.85%  | 7.10%  | 20.91%  | 12.71% | 19.85%   | 7.62%  | 11.24%     | 4.16%  | 16.05% | 10.38% |
|         | 5.52%               | 4.03% | 11.80%  | 4.96%  | 4.89%   | 6.55%  | 11.37%   | 8.67%  | 39.93%     | 7.78%  | 12.49% | 14.17% |
|         | 6.69%               | 6.07% | 5.87%   | 6.88%  | 12.81%  | 10.94% | 15.56%   | 6.11%  | 47.81%     | 16.35% | 19.03% | 22.59% |
|         |                     |       | 3.27%   | 2.95%  | 23.91%  | 17.85% | 10.90%   | 7.28%  |            |        |        |        |
|         |                     |       | 6.85%   | 5.84%  | 20.91%  | 12.71% | 5.13%    | 6.09%  |            |        |        |        |
|         |                     |       | 7.28%   | 8.20%  | 4.89%   | 6.55%  | 9.65%    | 5.77%  |            |        |        |        |
|         |                     |       | 7.71%   | 6.69%  | 12.81%  | 10.94% | 17.33%   | 11.74% |            |        |        |        |
| mean    | 9.04%               | 4.05% | 11.06%  | 7.50%  | 10.14%  | 8.31%  | 10.73%   | 7.61%  | 12.41%     | 5.93%  | 10.44% | 11.21% |
| P value | 0.003906            |       | 0.02124 |        | 0.01135 |        | 0.002441 |        | 0.003906   |        | 0.8438 |        |

| PAC1  |                     |       |        |       |        |       |       |       |            |        |        |        |
|-------|---------------------|-------|--------|-------|--------|-------|-------|-------|------------|--------|--------|--------|
| ATS   | Sodium Hypochlorite |       |        |       | PHMB   |       |       |       | Octenidine |        |        |        |
| Media | BHI                 |       | CWM    |       | BHI    |       | CWM   |       | BHI        |        | CWM    |        |
|       | DBD                 | H     | DBD    | H     | DBD    | H     | DBD   | H     | DBD        | H      | DBD    | H      |
|       | 16.46%              | 6.03% | 11.22% | 7.24% | 18.18% | 5.87% | 4.55% | 2.68% | 15.83%     | 19.53% | 6.39%  | 5.98%  |
|       | 16.55%              | 6.09% | 11.02% | 9.03% | 20.17% | 4.80% | 3.95% | 2.53% | 24.18%     | 19.76% | 6.39%  | 5.87%  |
|       | 21.10%              | 6.57% | 10.09% | 8.23% | 18.81% | 8.33% | 3.97% | 2.64% | 17.56%     | 3.84%  | 4.86%  | 4.83%  |
|       | 21.83%              | 4.80% | 4.65%  | 3.52% | 12.97% | 5.20% | 5.45% | 4.70% | 16.11%     | 7.74%  | 5.17%  | 5.01%  |
|       | 5.45%               | 4.41% | 14.46% | 8.96% | 18.10% | 5.05% | 6.75% | 5.84% | 19.86%     | 13.33% | 8.36%  | 7.85%  |
|       | 4.21%               | 4.07% | 7.77%  | 6.44% | 21.30% | 5.96% | 6.37% | 6.76% | 13.46%     | 6.76%  | 10.69% | 10.05% |
|       | 4.07%               | 3.88% | 7.21%  | 6.52% | 24.81% | 6.06% | 5.69% | 5.35% | 22.15%     | 7.01%  | 9.48%  | 9.00%  |

|         |          |       |           |       |           |        |         |       |          |       |          |       |
|---------|----------|-------|-----------|-------|-----------|--------|---------|-------|----------|-------|----------|-------|
|         | 3.93%    | 2.67% | 7.50%     | 4.17% | 28.24%    | 7.19%  | 6.52%   | 3.68% | 16.40%   | 6.25% | 7.69%    | 7.36% |
|         |          |       | 15.97%    | 9.35% | 23.91%    | 17.52% |         |       |          |       |          |       |
|         |          |       | 12.57%    | 5.11% | 20.91%    | 20.81% |         |       |          |       |          |       |
|         |          |       | 14.54%    | 8.82% | 25.47%    | 24.87% |         |       |          |       |          |       |
|         |          |       | 14.54%    | 4.48% | 22.30%    | 21.08% |         |       |          |       |          |       |
| mean    | 9.07%    | 4.64% | 8.78%     | 6.44% | 19.85%    | 5.97%  | 5.30%   | 4.00% | 17.89%   | 9.06% | 7.13%    | 6.78% |
| P value | 0.003906 |       | 0.0002441 |       | 0.0002441 |        | 0.01172 |       | 0.007813 |       | 0.003906 |       |

| PAC2    |                     |        |          |       |          |        |           |       |            |        |         |       |
|---------|---------------------|--------|----------|-------|----------|--------|-----------|-------|------------|--------|---------|-------|
| ATS     | Sodium Hypochlorite |        |          |       | PHMB     |        |           |       | Octenidine |        |         |       |
| Media   | BHI                 |        | CWM      |       | BHI      |        | CWM       |       | BHI        |        | CWM     |       |
|         | DBD                 | H      | DBD      | H     | DBD      | H      | DBD       | H     | DBD        | H      | DBD     | H     |
|         | 7.30%               | 4.02%  | 6.20%    | 3.89% | 10.55%   | 5.14%  | 6.59%     | 5.91% | 4.72%      | 4.16%  | 17.36%  | 3.61% |
|         | 5.80%               | 3.96%  | 4.54%    | 3.95% | 12.31%   | 4.94%  | 6.83%     | 4.72% | 6.42%      | 5.62%  | 6.35%   | 5.68% |
|         | 6.99%               | 4.55%  | 3.80%    | 3.35% | 11.45%   | 4.75%  | 7.07%     | 6.22% | 4.07%      | 3.73%  | 4.34%   | 4.31% |
|         | 9.56%               | 10.39% | 5.95%    | 3.29% | 8.67%    | 6.34%  | 9.53%     | 9.08% | 6.29%      | 6.66%  | 4.02%   | 6.76% |
|         | 5.21%               | 4.41%  | 9.21%    | 5.26% | 6.77%    | 2.65%  | 13.63%    | 9.26% | 8.99%      | 8.43%  | 7.41%   | 8.07% |
|         | 4.91%               | 3.43%  | 10.45%   | 6.58% | 28.41%   | 4.39%  | 7.07%     | 5.09% | 10.38%     | 9.69%  | 12.00%  | 7.67% |
|         | 2.95%               | 2.42%  | 9.45%    | 7.56% | 28.05%   | 6.50%  | 6.34%     | 6.22% | 14.89%     | 14.19% | 14.70%  | 9.13% |
|         | 3.07%               | 1.50%  | 10.21%   | 5.61% | 26.38%   | 6.72%  | 7.24%     | 6.69% | 20.58%     | 19.53% | 11.46%  | 7.52% |
|         |                     |        |          |       | 26.06%   | 20.93% | 7.49%     | 3.42% | 15.08%     | 12.95% |         |       |
|         |                     |        |          |       |          | 8.34%  | 9.23%     | 6.03% | 24.87%     | 20.81% |         |       |
|         |                     |        |          |       |          | 8.25%  | 12.22%    | 6.77% | 12.87%     | 16.17% |         |       |
|         |                     |        |          |       |          | 11.49% | 7.64%     | 5.87% | 25.61%     | 29.79% |         |       |
| mean    | 5.34%               | 3.78%  | 7.02%    | 4.73% | 15.37%   | 6.57%  | 8.16%     | 6.08% | 10.88%     | 10.46% | 8.56%   | 6.32% |
| P value | 0.01953             |        | 0.003906 |       | 0.001953 |        | 0.0002441 |       | 0.1331     |        | 0.05469 |       |

| PAC4    |                     |        |          |        |          |        |          |        |            |       |          |        |
|---------|---------------------|--------|----------|--------|----------|--------|----------|--------|------------|-------|----------|--------|
| ATS     | Sodium Hypochlorite |        |          |        | PHMB     |        |          |        | Octenidine |       |          |        |
| Media   | BHI                 |        | CWM      |        | BHI      |        | CWM      |        | BHI        |       | CWM      |        |
|         | DBD                 | H      | DBD      | H      | DBD      | H      | DBD      | H      | DBD        | H     | DBD      | H      |
|         | 16.49%              | 8.85%  | 16.55%   | 16.56% | 15.99%   | 5.74%  | 20.18%   | 12%    | 7.45%      | 3.68% | 22.84%   | 10.36% |
|         | 17.18%              | 6.35%  | 23.28%   | 14.29% | 16.92%   | 5.37%  | 13.82%   | 11%    | 6.26%      | 4.04% | 35.59%   | 11.25% |
|         | 28.57%              | 8.29%  | 21.62%   | 18.64% | 13.35%   | 5.79%  | 23.84%   | 5%     | 7.50%      | 3.99% | 21.49%   | 12.75% |
|         | 25.80%              | 7.06%  | 17.32%   | 15.96% | 17.78%   | 6.29%  | 19.42%   | 19%    | 7.45%      | 3.69% | 15.97%   | 14.21% |
|         | 20.16%              | 13.61% | 7.46%    | 3.30%  | 9.57%    | 9.83%  | 12.60%   | 6%     | 12.93%     | 9.83% | 20.01%   | 10.08% |
|         | 27.65%              | 10.75% | 9.50%    | 2.56%  | 8.37%    | 6.81%  | 18.95%   | 10%    | 19.41%     | 8.12% | 15.86%   | 12.15% |
|         | 23.22%              | 17.46% | 12.75%   | 2.18%  | 7.50%    | 6.53%  | 15.84%   | 18%    | 10.49%     | 5.14% | 12.86%   | 10.67% |
|         | 16.60%              | 10.84% | 7.14%    | 2.72%  | 7.45%    | 3.34%  | 15.37%   | 12%    | 7.77%      | 6.67% | 15.44%   | 7.94%  |
|         |                     |        |          |        | 11.24%   | 10.37% | 43.44%   | 43%    |            |       |          |        |
|         |                     |        |          |        | 11.24%   | 11.01% | 58.29%   | 58%    |            |       |          |        |
| mean    | 21.45%              | 9.89%  | 13.22%   | 6.59%  | 14.24%   | 9.17%  | 22.75%   | 16.47% | 9.24%      | 5.27% | 19.08%   | 11.03% |
| P value | 0.003906            |        | 0.007813 |        | 0.001709 |        | 0.006104 |        | 0.003906   |       | 0.003906 |        |

\*DBD= débridement = before antiseptic contact

**Table S3.** Studies assessing Minimum Inhibitory Concentrations (MIC) of sodium hypochlorite, PVPI, PHMB and octenidine.

| Antiseptics         | MIC                       | Dilution     | <i>Pseudomonas</i> strains   | Method              | References    |
|---------------------|---------------------------|--------------|------------------------------|---------------------|---------------|
| Sodium Hypochlorite | 1%                        | 1:5          | ATCC 27853                   | Personal            | [31]          |
|                     | 0.025%                    | 1:20         | NCIMB 12469                  | Personal            | [32]          |
|                     | 800 mg.L <sup>-1</sup>    | 1:6          | ATCC27853                    | Microdilution broth | [33]          |
|                     | 512 mg.L <sup>-1</sup>    | 1:10         | 60 clinical isolates         | Microdilution broth | [34]          |
|                     | 400 mg.L <sup>-1</sup>    | 1:12         | Clinical isolate             | Microdilution broth | [33]          |
|                     | 312.5 mg.L <sup>-1</sup>  | 1:16         | ATCC 27853                   | Microdilution broth | [35]          |
|                     | 312.5 mg.L <sup>-1</sup>  | 1:16         | 10 clinical isolates         | Microdilution broth | [35]          |
|                     | 1,666 mg.L <sup>-1</sup>  | 1:3          | PAO1 and 3 clinical isolates | Microdilution broth | Current study |
| PVPI                | 1,024 mg.L <sup>-1</sup>  | 1:100        | ATCC 15442                   | Microdilution broth | [37]          |
|                     | 5%                        | 1:2          | UCBPP-PA14                   | Personal            | [38]          |
|                     | 0.04%                     | 1:250        | ATCC 15442                   | Microdilution broth | [39]          |
|                     | 7,500 mg.L <sup>-1</sup>  | 1:16         | ATCC 27853                   | Microdilution broth | [40]          |
|                     | 12,500 mg.L <sup>-1</sup> | 1:8          | PAO1 and 3 clinical isolates | Microdilution broth | Current study |
| PHMB                | 2 mg.L <sup>-1</sup>      | 1:512        | ATCC 15442                   | Microdilution broth | [37]          |
|                     | 4 mg.L <sup>-1</sup>      | 1:256        | ATCC 27853                   | Microdilution broth | [41]          |
|                     | 8 mg.L <sup>-1</sup>      | 1:258        | 3 clinical isolates          | Microdilution broth | [41]          |
|                     | 16-32 mg.L <sup>-1</sup>  | 1:64 to 1:32 | 25 clinical isolates         | Microdilution broth | [42]          |
|                     | 7.8 mg.L <sup>-1</sup>    | 1:128        | ATCC 27853                   | Microdilution broth | [33]          |
|                     | 15.6 mg.L <sup>-1</sup>   | 1:64         | Clinical isolates            | Microdilution broth | [33]          |
|                     | 10 mg.L <sup>-1</sup>     | 1:100        | ATCC 27853                   | Microdilution broth | [40]          |
|                     | 15.6 mg.L <sup>-1</sup>   | 1:64         | PAO1 and 3 clinical isolates | Microdilution broth | Current study |
| Octenidine          | 2 mg.L <sup>-1</sup>      | 1:256        | ATCC 15442                   | Microdilution broth | [37]          |
|                     | 4-16 mg.L <sup>-1</sup>   | 1:128-1:32   | 2 clinical isolates          | Microdilution broth | [43]          |
|                     | 3.9 mg.L <sup>-1</sup>    | 1:128        | ATCC 27853                   | Microdilution broth | [33]          |
|                     | 3.9 mg.L <sup>-1</sup>    | 1:32         | Clinical isolate             | Microdilution broth | [33]          |
|                     | 1 mg.L <sup>-1</sup>      | 1:500        | ATCC 27853                   | Microdilution broth | [40]          |
|                     | 7.8 mg.L <sup>-1</sup>    | 1:64         | PAO1 and 3 clinical isolates | Microdilution broth | Current study |
